# Supplementary material
Source: MDPI journal article supplement (https://www.mdpi.com/2073-4344/9/12/992)
Supplement: s1 [file s1]

# Ca-based catalysts for the production of high-quality bio-oils from the catalytic co-pyrolysis of grape seeds and waste tyres

O. Sanahuja-Parejo<sup>1</sup>, A. Veses<sup>1</sup>, J.M. López<sup>1</sup>, R. Murillo<sup>1</sup>, M. S. Callén<sup>1</sup> and T. García<sup>1</sup>, \*

<sup>1</sup> Instituto de Carboquímica (ICB-CSIC), C/ Miguel Luesma Castán, 50018 Zaragoza, Spain

\* Correspondence: tomas@icb.csic.es

## Supplementary Materials

### S.1 Pilot plant operation

A typical pyrolysis experiment comprises the following steps:

1. The selected feedstock/mixtures and catalysts + heat carrier is put inside each hoppers.
2. General services switch-on: the cooling water and natural gas valves of the flare are open. At this point, the condenser, screw feeders and flare are able to work in a safety way.
3. N<sub>2</sub> valve is open and the flows that will be used during the experiment are set in the mass flow controllers.
4. The screw conveyor inside the reactor is connected and the final rotating speed that will be used along the experiment is set in the frequency converter.
5. The power supply for the electrical resistances around the reactor is switched on and the system starts to be heated with a constant heating rate of 5 °C/min.
6. Once the desired temperature in the reactor is achieved, the feeding system of feedstock and catalyst starts.
7. The steady state conditions are achieved after 30 minutes (constant temperature and pressure profiles and stable flame in the flare). After this period, the liquids in the vessels are purged and weighed.
8. The experiment proceeds until the material that was introduced in the hopper is finished. In the meantime, 3 gas samples are collected and analysed in the gas chromatographs.
9. After all the material is fed, the heating continues during 15 extra minutes to be sure that all the material inside the reactor is converted. After that, the electrical resistances are switch off maintaining the rest of the systems on (cooling water, N<sub>2</sub> flow and flare).
10. When the system reaches room temperature, all the systems are switched off and the liquid and solid are purged and weighed to calculate yields and mass balance.
11. Solid and liquid samples are taken and stored for further analyses.
12. Some sections of the pilot plant are dismantled for cleaning and maintenance. After all this sequence, the pilot plant is ready for another experiment.

**Table S1.** Yields after Catalytic experiments of GS and WT using Ca-based-1 catalyst.

|          | Liquid (wt%) |            | Solid (wt%) |      |                 | Gas (wt%)  | Balance | Phase Distribution (wt%) |      |
|----------|--------------|------------|-------------|------|-----------------|------------|---------|--------------------------|------|
|          | Org.         | Aq.        | Char        | Coke | CO <sub>2</sub> |            |         | Org.                     | Aq.  |
| GS : CaO | 15.2 ± 0.8   | 28.1 ± 1.4 | 33.1 ± 1.6  | 0.27 | 0.9             | 17.6 ± 1.0 | 95.2    | 37.7                     | 62.3 |
| WT : CaO | 36.6 ± 1.8   | 0.0 ± 0.0  | 38.7 ± 1.8  | 0.15 | 0.3             | 23.1 ± 2.1 | 98.7    | 100.0                    | 0.0  |

**Table S2.** Liquid properties after the catalytic experiments of GS and WT using Ca-based-1 catalyst.

|     | Properties             |     |            |             | Elemental analysis (wt.%) |           |           |            |           |             |
|-----|------------------------|-----|------------|-------------|---------------------------|-----------|-----------|------------|-----------|-------------|
|     | H <sub>2</sub> O (wt%) | pH  | ν(mPa.s)   | ρ(g/mL)     | C                         | H         | N         | S          | O         | HHV (MJ/kg) |
| GSs | 4.1 ± 0.6              | 8.3 | 85.3 ± 2.3 | 1.30 ± 0.10 | 76.8 ± 1.1                | 8.1 ± 0.3 | 2.8 ± 0.1 | 0.4 ± 0.01 | 11.8 ±    | 34.5 ± 1.6  |
| WTs | <0.3 ± 0.0             | 8.4 | 3.3 ± 0.2  | 0.87 ± 0.02 | 89.4 ± 1.3                | 7.9 ± 0.2 | 1.2 ± 0.1 | 0.5 ± 0.02 | 1.0 ± 0.1 | 42.3 ± 1.8  |

**Table S3.** Ultimate composition of the aqueous fraction after catalytic co-pyrolysis experiments

|                | Elemental analysis (wt.%) |            |           |           |            |
|----------------|---------------------------|------------|-----------|-----------|------------|
|                | C                         | H          | N         | S         | O          |
| GSs/WTs(80/20) | 5.3 ± 0.3                 | 11.0 ± 0.5 | 2.0 ± 0.1 | 0.0 ± 0.0 | 81.7 ± 1.5 |
| Ca-based-1     | 4.6 ± 0.2                 | 11.1 ± 0.5 | 2.1 ± 0.1 | 0.0 ± 0.0 | 82.2 ± 1.6 |
| Ca-based-2     | 6.5 ± 0.4                 | 11.0 ± 0.5 | 2.7 ± 0.2 | 0.0 ± 0.0 | 79.8 ± 1.4 |
| Ca-based-3     | 4.6 ± 0.2                 | 10.8 ± 0.4 | 2.1 ± 0.1 | 0.0 ± 0.0 | 82.5 ± 1.6 |
| Ca-based-4     | 4.1 ± 0.2                 | 11.1 ± 0.5 | 1.9 ± 0.1 | 0.0 ± 0.0 | 82.9 ± 1.7 |

**Table S4.** Identified compounds (sorted by increasing retention time) in the liquid by GC/MS obtained after grape seeds pyrolysis.

| Time   | Compound Name      |
|--------|--------------------|
| 8.13   | Benzene            |
| 8.353  | 1,4-Cyclohexadiene |
| 11.633 | Toluene            |
| 12.426 | 4-Nonene           |
| 15.604 | Ethylbenzene       |
| 16.016 | p-Xylene           |
| 16.738 | 3-Undecene, (E)-   |

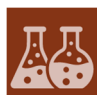

---

|        |                                         |
|--------|-----------------------------------------|
| 17.017 | Styrene                                 |
| 18.36  | Benzene,1-ethyl-2-methyl-               |
| 19.396 | Benzene,2-propenyl-                     |
| 19.704 | Benzene, propyl-                        |
| 20.026 | Benzene,1-ethyl-3-methyl-               |
| 20.191 | Benzene, 1-ethyl-2-methyl-              |
| 20.398 | 2,4-Nonadiyne                           |
| 20.704 | Phenol                                  |
| 20.804 | Benzene, 1-ethyl-2-methyl-              |
| 20.947 | .alpha.-Methylstyrene                   |
| 21.07  | 4-Chloro-3-n-hexyltetrahydropyran       |
| 21.402 | Benzene, 2-propenyl-                    |
| 21.496 | Benzene,1-ethyl-3-methyl-               |
| 21.57  | Benzene,1-ethenyl-2-methyl-             |
| 21.804 | Benzene,1-ethenyl-2-methyl-             |
| 22.12  | Benzeneacetaldehyde, .alpha.-methyl-    |
| 22.756 | o-Cymene                                |
| 22.918 | D-Limonene                              |
| 23.346 | Indane                                  |
| 23.781 | Benzene,1-propynyl-                     |
| 23.854 | Phenol, 2-methyl-                       |
| 24.111 | Benzene, (1-methylenepropyl)-           |
| 24.74  | p-Cresol                                |
| 25.207 | Isopinocarveol                          |
| 27.676 | Phenol,2,4-dimethyl-                    |
| 28.02  | Naphthalene, 1,2-dihydro-               |
| 28.363 | Benzene, (1-methylene-2-propenyl)-      |
| 28.725 | Naphthalene, 1,2-dihydro-               |
| 28.837 | Benzenemethanol, 4-methyl-              |
| 29.394 | Cathecol                                |
| 29.599 | Napthalene                              |
| 30.007 | Phenol, 2,4,6-trimethyl-                |
| 30.628 | Phenol, 2-ethyl-5-methyl-               |
| 31.031 | Phenol, 2-ethyl-6-methyl-               |
| 32.706 | E-9-Tetradecenoic acid                  |
| 33.022 | 2-Allylphenol                           |
| 33.661 | 1H-Indene, 1-ethylidene-                |
| 34.24  | Bicyclo(4.4.1)undeca,1,3,5,7,9-pentaene |
| 36.109 | 9-Hexadecenoic acid                     |
| 36.472 | Biphenyl                                |
| 38.088 | Diphenylmethane                         |
| 39.027 | Acenaphthylene                          |
| 39.315 | 9-Hexadecenoic acid                     |
| 39.57  | HC lineal                               |
| 39.832 | 1,1'-Biphenyl-4-methyl-                 |
| 40.935 | Bibenzyl                                |

---

|        |                                                                                    |
|--------|------------------------------------------------------------------------------------|
| 41.781 | Benzene,1,1'-(1-methyl-1-2-ethanediyl)bis-                                         |
| 42.339 | 9-Hexadecenoic acid                                                                |
| 42.578 | HC lineal                                                                          |
| 43.174 | Fluorene                                                                           |
| 44.801 | Benzene,1,1'-(1,3-propanediyl)bis-                                                 |
| 45.404 | HC lineal                                                                          |
| 45.542 | Benzene, 1,1'-(1-methyl-1,3-propanediyl)                                           |
| 46.284 | Anthracene, 9,10-dihydro-                                                          |
| 46.562 | Estilbene                                                                          |
| 46.61  | Napthalene,1,2,3,4-tetrahydro-1-phenyl-                                            |
| 47.147 | 1,2-Diphenylcyclopropane                                                           |
| 48.161 | 1H-Indene, 2-phenyl-                                                               |
| 48.803 | Benzene, 1,1'-(3-methyl-1-propene-1,3-di                                           |
| 48.914 | Phenanthrene                                                                       |
| 50.194 | Napthalene,(1-phenyl-methyl)-                                                      |
| 50.603 | Anthracene, 9-ethenyl-                                                             |
| 50.897 | 2-Heptadecanone                                                                    |
| 51.58  | Naphthalene, 1,2-dihydro-4-phenyl-                                                 |
| 52.448 | Anthracene, 1-methyl-                                                              |
| 55.682 | 2-Nonadecanone                                                                     |
| 57.583 | p-terphenyl                                                                        |
| 58.505 | m-terphenyl                                                                        |
| 61.572 | Dasycarpidan-1-one                                                                 |
| 68.299 | Tribenzo(a,e,i)cyclododecene                                                       |
| 70.829 | 9,12,15-Octadecatrienoic aci, 2,3-bis(trimethylsilyl)oxy)propyl) ester<br>(Z,Z,Z)- |
| 73.215 | 1,1',3',1'' -Terphenyl,5'-phenyl-                                                  |

**Table S5.** Identified compounds (sorted by increasing retention time) in the liquid by GC/MS obtained after PS pyrolysis.

| Time   | Compound Name                   |
|--------|---------------------------------|
| 7.55   | 1,3-Cyclopentadiene,5-methyl-   |
| 7.661  | 1,4-Cyclohexadiene              |
| 7.82   | Cyclopentene,3-methyl-          |
| 8.13   | Benzene                         |
| 8.345  | 1,4-Cyclohexadiene              |
| 10.889 | Cyclopentadiene, 5,5-dimethyl-  |
| 11.213 | 1,4-Cyclohexadiene, 1-methyl-   |
| 11.64  | Toluene                         |
| 13.948 | 1,3-Dimethyl-1-cyclohexene      |
| 14.057 | Cyclopentene,1-(1-methylethyl)- |
| 15.604 | Ethylbenzene                    |
| 16.016 | p-Xylene                        |

|        |                                                |
|--------|------------------------------------------------|
| 17.017 | Styrene                                        |
| 18.378 | Benzene,1-ethyl-2-methyl-                      |
| 19.396 | Benzene,2-propenyl-                            |
| 19.704 | Benzene, propyl-                               |
| 20.026 | Benzene,1-ethyl-3-methyl-                      |
| 20.191 | Benzene, 1-ethyl-2-methyl-                     |
| 20.398 | Benzene,1,2,3-trimethyl-                       |
| 20.704 | Phenol                                         |
| 20.804 | Benzene, 1-ethyl-2-methyl-                     |
| 20.947 | .alpha.-Methylstyrene                          |
| 21.402 | Benzene, 2-propenyl-                           |
| 21.496 | Benzene,1-ethyl-3-methyl-                      |
| 21.57  | Benzene,1-ethenyl-2-methyl-                    |
| 21.804 | Benzene,1-ethenyl-2-methyl-                    |
| 22.528 | Benzene,1-methyl-3-(1-methylethyl)-            |
| 22.694 | Benzene,1-ethyl-3-methyl-                      |
| 22.756 | o-Cymene                                       |
| 22.947 | 1-(2-Methylphenyl)ethanol                      |
| 23.346 | Indane                                         |
| 23.781 | Benzene,1-propynyl-                            |
| 23.875 | Benzyl alcohol                                 |
| 24.079 | Benzene,2-ethyl,1,4-dimethyl-                  |
| 24.765 | p-Cresol                                       |
| 24.868 | 1,4-Cyclohexadiene,3-ethenyl,1,4-dimethyl-     |
| 24.997 | o-Cymene                                       |
| 25.126 | o-Isopropenyltoluene                           |
| 25.245 | p-Cymene                                       |
| 25.515 | o-Isopropenyltoluene                           |
| 25.724 | Benzene,1-methyl-4-(2-propenyl)-               |
| 26.717 | Benzene,1,2,4,5-tetramethyl-                   |
| 26.976 | Benzene,(2-methyl-1-propenyl)-                 |
| 27.19  | 2,4-Dimethylstyrene                            |
| 27.344 | 3a,6-Methano-3aH-indene,2,3,6,7-tetrahydro-    |
| 27.497 | Benzene, (1-methylenebutyl)-                   |
| 27.607 | Benzene,1-methyl-4-(2-propenyl)-               |
| 27.709 | Phenol,2,3-dimethyl-                           |
| 28.024 | Naphthalene, 1,2-dihydro-                      |
| 28.246 | Benzene,1-butyryl-                             |
| 28.708 | Tetracyclo(5.3.0.0.<2.6>0<3.10>)deca-4,8-diene |
| 29.109 | (1-Methylenebut-2-enyl)benzene                 |
| 29.599 | Napthalene                                     |
| 30.626 | Benzene, (3-methyl-2-butenyl)-                 |
| 31.173 | Benzothiazole                                  |
| 32.002 | 1H-Indene,1,3-dimethyl-                        |
| 32.21  | Benzene, (2-cyclopropylethenyl)-               |
| 32.363 | 1H-Indene,1,1-dimethyl-                        |

|        |                                                     |
|--------|-----------------------------------------------------|
| 32.441 | Napthalene,1,2-dihydro,3-methyl-                    |
| 32.528 | Napthalene,1,2-dihydro,6-methyl-                    |
| 32.822 | (1-Methylpenta-1,3-dienyl)benzene                   |
| 33.657 | Bicyclo(4.4.1)undeca,1,3,5,7,9-pentaene             |
| 34.24  | Benzocycloheptatriene                               |
| 35.738 | (1-Methylenepent-2-enyl)benzene                     |
| 35.898 | (1-Methylpenta-2,4-dienyl)benzene                   |
| 36.151 | 1,2,3-Trimethylindene                               |
| 36.477 | Biphenyl                                            |
| 36.873 | Benzo(b)thiophene,2,7-dimethyl-                     |
| 36.988 | Napthalene,1-ethyl-                                 |
| 37.376 | Napthalene,2,6-dimethyl-                            |
| 37.429 | Napthalene,1,3-dimethyl-                            |
| 37.831 | Napthalene,1,7-dimethyl-                            |
| 37.984 | Napthalene,1,8-dimethyl-                            |
| 38.503 | Quinoline,2,7-dimethyl-                             |
| 39.028 | Napthalene,1,8-dimethyl-                            |
| 39.851 | 1,1'-Biphenyl-4-methyl-                             |
| 40.066 | Acenaphthene                                        |
| 40.18  | 1,1'-Biphenyl-2-methyl-                             |
| 40.531 | Napthalene,1-(1-methylethyl)-                       |
| 41.07  | 3-(2-Methylpropenyl)-1H-Indene                      |
| 41.349 | Napthalene,1,4,5-trimethyl-                         |
| 41.792 | Napthalene,1,4,6-trimethyl-                         |
| 41.961 | Napthalene,2,3,6-trimethyl-                         |
| 42.293 | 1-Isopropenylnapthalene                             |
| 42.366 | Napthalene,1,6,7-trimethyl-                         |
| 42.44  | 4,6,8-Trimethylazulene                              |
| 42.59  | Fluorene                                            |
| 42.984 | Fluorene,2,4a-dihydro-                              |
| 43.162 | 1H-Phenylene                                        |
| 43.339 | Bi,1,3,5-Cycloheptatrien-1-yl                       |
| 43.561 | 1-Isopropenylnapthalene                             |
| 44.509 | Napthalene, 1-(2-nitro-2-propenyl)-                 |
| 45.855 | Benzene, (4,5,5-trimethyl,1,3-cyclopentadien-1-yl)- |
| 46.408 | 9H-Fluorene,2-methyl-                               |
| 46.461 | 9H-Fluorene,1-methyl-                               |
| 46.929 | 9H-Fluorene,9-methyl-                               |
| 48.911 | Phenanthrene                                        |
| 49.202 | 9,10-Ethanoanthracene,9,10-dihydro,11,12-diacetyl-  |
| 49.502 | Anthracene, 9,10-dihydro-2-methyl-                  |
| 49.651 | .alpha. Methylstilbene                              |
| 50.91  | 5H-Dibenzo(a,d)cyclohepten-5-ol, 10,11-dihydro-     |
| 51.807 | 1H-Indene, 2-phenyl-                                |
| 51.975 | 1H-Cyclopropa(l)phenanthrene,1a,9b-dihydro-         |
| 52.249 | Cyclobuta(a)dibenzo(c,f)cycloheptadiene, 1-methyl-  |

|        |                                                |
|--------|------------------------------------------------|
| 52.412 | Anthracene, 1-methyl-                          |
| 52.94  | 1,4-Benzenediamine, N-phenyl-                  |
| 53.15  | 2,3-Diazabicyclo(2.2.1)hept-2-ene,1,4-diphenyl |
| 53.616 | Napthalene,2-phenyl-                           |
| 55.099 | 1,3-Diphenyl-3-methylcyclopropene              |
| 55.309 | 9,10-Dimethylantracene                         |
| 57.367 | Pyrene                                         |
| 57.793 | 1,3-Pentadiene, 1,1-diphenyl-, (Z)-            |
| 73.272 | Tribenzo(a,e,i)cyclododecene                   |

**Table S6.** Identified compounds (sorted by increasing retention time) in the liquid by GC/MS obtained after co-pyrolysis of GS and WT experiments.

| Time   | Compound Name                                  |
|--------|------------------------------------------------|
| 8.219  | Benzene                                        |
| 11.713 | 1,3,5-Cycloheptatriene                         |
| 12.502 | 1-Octene                                       |
| 15.664 | Ethylbenzene                                   |
| 16.064 | p-Xylene                                       |
| 16.797 | 2-Nonenal, (E)-                                |
| 17.064 | Styrene                                        |
| 18.447 | Benzene,1-ethyl-2-methyl-                      |
| 19.908 | Cyclohexene,1-methyl-4-(1-methylethenyl)-,(S)- |
| 20.074 | Benzene,1-ethyl-3-methyl-                      |
| 20.233 | Benzene, 1-ethyl-2-methyl-                     |
| 20.454 | Benzene,1,2,4-trimethyl-                       |
| 20.772 | Phenol                                         |
| 20.872 | Benzene, 1-ethyl-2-methyl-                     |
| 21.01  | .alpha.-Methylstyrene                          |
| 21.137 | 4-Undecene,5-methyl-, (E)-                     |
| 21.478 | 1,5,5-Trimethyl-6-methylene-cyclohexene        |
| 21.54  | Benzene,1,2,4-trimethyl-                       |
| 21.62  | Benzene,1-ethenyl-2-methyl-                    |
| 22.585 | trans-3-Caren-2-ol                             |
| 22.751 | Benzene,1-ethyl-3-methyl-                      |
| 22.796 | 2,6-Dimethyl-1,3,5,7-octatetraene,E,E-         |
| 22.987 | D-Limonene                                     |
| 23.403 | 1,3-Methanopentalene,1,2,3,5-tetrahydro-       |
| 23.846 | 1-Propyne-3-phenyl-                            |
| 23.937 | Benzyl alcohol                                 |
| 24.126 | 2,6-Dimethyl-1,3,5,7-octatetraene,E,E-         |
| 24.798 | Phenol,3-methyl-                               |
| 25.058 | 1,4-Cyclohexadiene,3-ethenyl,1,2-dimethyl-     |
| 25.275 | 7-Tetradecene                                  |



|        |                                                                    |
|--------|--------------------------------------------------------------------|
| 25.581 | Benzene,1-methyl-4-(1-methylethenyl)-                              |
| 26.297 | 10,12-Octadecadiynoic acid                                         |
| 26.777 | 6,7-Dimethyl,3,5,8,8a-tetrahydro-1H-2-benzopyran                   |
| 27.273 | 5,7-Dodecadiyn,1,12-diol                                           |
| 27.653 | 3a.6-Methano,3aH-indene,2,3,6,7-tetrahydro-                        |
| 27.768 | Phenol,2,3-dimethyl-                                               |
| 28.071 | 1,2-Butadiene,3-phenyl-                                            |
| 28.488 | Bicyclo(3.1.1)hept-2-ene-2-ethanol, 6,6-dimethyl-                  |
| 29.142 | 7-Tetradecene                                                      |
| 29.437 | Hydrocinnamic acid,o-(1,2,3,4-tetrahydro-2-naphthyl-methyl)-       |
| 29.652 | Napthalene                                                         |
| 29.786 | Benzene,(3-methyl-2-butenyl)-                                      |
| 30.924 | Bicyclo(3.1.1)hept-3-ene-spiro-2-4'-(1',3'-dioxane), 7,7-dimethyl- |
| 31.159 | 1,2,4-Metheno-1H-cyclobuta(cd)pentalene,3,5-diol, octahydro-       |
| 31.941 | Oxacyclotetradeca-4,11-diyne                                       |
| 32.064 | (1-Methylenebut-2-enyl)benzene                                     |
| 32.272 | Napthalene,1,2-dihydro-3-methyl-                                   |
| 32.769 | 7-Tetradecene                                                      |
| 33.038 | 4-Hydroxy-4-methylhex-5-enoic acid, tert-butyl-ester               |
| 33.718 | Benzocycloheptatriene                                              |
| 34.3   | Bicyclo(4.4.1)undeca,1,3,5,7,9-pentaene                            |
| 35.556 | 4,7,10,13,16,19-Docosahexaenoic acid, methyl ester, (all-Z)-       |
| 36.174 | 7-Tetradecene                                                      |
| 36.407 | 9-Octadecen-12-ynoic acid, methyl ester                            |
| 36.539 | Biphenyl                                                           |
| 39.376 | 9-Hexadecenoic acid                                                |
| 39.589 | Geranyl isovalerate                                                |
| 40.97  | Benzaldehyde-4-benzyloxy-3-fluoro-5-methoxy-                       |
| 41.402 | 3-(2-Methyl-propenyl)-1H-indene                                    |
| 42.393 | 9-Hexadecenoic acid                                                |
| 44.845 | Benzene,1,1'-(1,3-propanediyl)bis-                                 |
| 45.253 | 9-Hexadecenoic acid                                                |
| 45.426 | Geranyl isovalerate                                                |
| 46.62  | 5,8,11,14-Eicosatetraynoic acid                                    |
| 46.663 | Napthalene,1,2,3,4-tetrahydro-1-phenyl-                            |
| 47.178 | 1,2-Diphenylcyclopropane                                           |
| 47.961 | Erucid acid                                                        |
| 48.201 | Cyclobuta(a)dibenzo(8c,f)cycloheptadiene, 1-methyl-                |
| 48.953 | 9,10-Ethanoanthracene,9,10-dihydro,11,12-diacetyl-                 |
| 50.66  | Olean-12-ene-3,28-diol, (3. beta)-                                 |
| 50.837 | 2-Heptadecanone                                                    |
| 53.632 | Napthalene,2-phenyl-                                               |
| 57.279 | Isoquinoline,(1-phenylmethyl)-                                     |
| 63.795 | Lineal HC                                                          |
| 65.688 | Lineal HC                                                          |
| 67.491 | Lineal HC                                                          |



|        |                                   |
|--------|-----------------------------------|
| 69.255 | Lineal HC                         |
| 71.109 | Lineal HC                         |
| 73.27  | 1,1',3',1'' -Terphenyl,5'-phenyl- |

**Table S7.** Identified compounds (sorted by increasing retention time) in the liquid by GC/MS obtained after Catalytic co-pyrolysis of GS and WT experiments.

| Time   | Compound Name                                    |
|--------|--------------------------------------------------|
| 8.219  | Benzene                                          |
| 11.713 | 1,3,5-Cycloheptatriene                           |
| 12.502 | 1-Octene                                         |
| 15.664 | Ethylbenzene                                     |
| 16.064 | p-Xylene                                         |
| 16.797 | 2-Nonenal, (E)-                                  |
| 17.064 | Styrene                                          |
| 18.447 | Benzene,1-ethyl-2-methyl-                        |
| 19.908 | Cyclohexene,1-methyl-4-(1-methylethenyl)-,(S)-   |
| 20.074 | Benzene,1-ethyl-3-methyl-                        |
| 20.233 | Benzene, 1-ethyl-2-methyl-                       |
| 20.454 | Benzene,1,2,4-trimethyl-                         |
| 20.772 | Phenol                                           |
| 20.872 | Benzene, 1-ethyl-2-methyl-                       |
| 21.01  | .alpha.-Methylstyrene                            |
| 21.137 | 4-Undecene,5-methyl-, (E)-                       |
| 21.478 | 1,5,5-Trimethyl-6-methylene-cyclohexene          |
| 21.54  | Benzene,1,2,4-trimethyl-                         |
| 21.62  | Benzene,1-ethenyl-2-methyl-                      |
| 22.585 | trans-3-Caren-2-ol                               |
| 22.751 | Benzene,1-ethyl-3-methyl-                        |
| 22.796 | 2,6-Dimethyl-1,3,5,7-octatetraene,E,E-           |
| 22.987 | D-Limonene                                       |
| 23.403 | 1,3-Methanopentalene,1,2,3,5-tetrahydro-         |
| 23.846 | 1-Propyne-3-phenyl-                              |
| 23.937 | Benzyl alcohol                                   |
| 24.126 | 2,6-Dimethyl-1,3,5,7-octatetraene,E,E-           |
| 24.798 | Phenol,3-methyl-                                 |
| 25.058 | 1,4-Cyclohexadiene,3-ethenyl,1,2-dimethyl-       |
| 25.275 | 7-Tetradecene                                    |
| 25.581 | Benzene,1-methyl-4-(1-methylethenyl)-            |
| 26.297 | 10,12-Octadecadiynoic acid                       |
| 26.777 | 6,7-Dimethyl,3,5,8,8a-tetrahydro-1H-2-benzopyran |
| 27.653 | 3a.6-Methano,3aH-indene,2,3,6,7-tetrahydro-      |
| 27.768 | Phenol,2,3-dimethyl-                             |
| 28.071 | 1,2-Butadiene,3-phenyl-                          |



---

|        |                                                              |
|--------|--------------------------------------------------------------|
| 28.142 | Benzene, (1-methyl-2-propenyl)-                              |
| 28.488 | Bicyclo(3.1.1)hept-2-ene-2-ethanol, 6,6-dimethyl-            |
| 29.142 | 7-Tetradecene                                                |
| 29.273 | 2,5-Octadecadiynoic acid, methyl ester                       |
| 29.437 | Hydrocinnamic acid,o-(1,2,3,4-tetrahydro-2-naphthyl-methyl)- |
| 29.652 | Napthalene                                                   |
| 29.786 | Benzene,(3-methyl-2-butenyl)-                                |
| 31.159 | 1,2,4-Metheno-1H-cyclobuta(cd)pentalene,3,5-diol, octahydro- |
| 31.941 | Oxacyclotetradeca-4,11-diyne                                 |
| 32.064 | (1-Methylenebut-2-enyl)benzene                               |
| 32.272 | Napthalene,1,2-dihydro-3-methyl-                             |
| 32.769 | 7-Tetradecene                                                |
| 33.038 | 4-Hydroxy-4-methylhex-5-enoic acid, tert-butyl-ester         |
| 33.718 | Benzocycloheptatriene                                        |
| 34.3   | Bicyclo(4.4.1)undeca,1,3,5,7,9-pentaene                      |
| 35.556 | 4,7,10,13,16,19-Docosahexaenoic acid, methyl ester, (all-Z)- |
| 36.174 | 7-Tetradecene                                                |
| 36.407 | 9-Octadecen-12-ynoic acid, methyl ester                      |
| 36.539 | Biphenyl                                                     |
| 39.376 | 9-Hexadecenoic acid                                          |
| 39.589 | Geranyl isovalerate                                          |
| 40.97  | Benzaldehyde-4-benzyloxy-3-fluoro-5-methoxy-                 |
| 41.402 | 3-(2-Methyl-propenyl)-1H-indene                              |
| 42.393 | 9-Hexadecenoic acid                                          |
| 44.845 | Benzene,1,1'-(1,3-propanediyl)bis-                           |
| 45.253 | 9-Hexadecenoic acid                                          |
| 45.426 | Geranyl isovalerate                                          |
| 45.581 | 10,13-Octadecadiynoic acid, methyl ester                     |
| 46.62  | 5,8,11,14-Eicosatetraynoic acid                              |
| 46.663 | Napthalene,1,2,3,4-tetrahydro-1-phenyl-                      |
| 47.178 | 1,2-Diphenylcyclopropane                                     |
| 47.961 | Erucid acid                                                  |
| 48.201 | Cyclobuta(a)dibenzo(8c,f)cycloheptadiene, 1-methyl-          |
| 48.84  | 5,8,11,14-Eicosatetraynoic acid                              |
| 48.953 | 9,10-Ethanoanthracene,9,10-dihydro,11,12-diacetyl-           |
| 50.66  | Olean-12-ene-3,28-diol, (3. beta)-                           |
| 50.837 | 2-Heptadecanone                                              |
| 51.624 | Carnegine                                                    |
| 53.632 | Napthalene,2-phenyl-                                         |
| 55.13  | 13-Heptadecyn-1-ol                                           |
| 55.267 | Ethanol,2-(9,12-octadecadienyloxy)- (Z,Z)-                   |
| 55.682 | 2-Nonadecanone                                               |
| 57.279 | Isoquinoline,(1-phenylmethyl)-                               |
| 61.572 | Dasycarpidan-1-one                                           |
| 61.837 | Lineal HC                                                    |
| 63.795 | Lineal HC                                                    |

---

|        |                                  |
|--------|----------------------------------|
| 65.688 | Lineal HC                        |
| 67.491 | Lineal HC                        |
| 69.255 | Lineal HC                        |
| 71.109 | Lineal HC                        |
| 73.27  | 1,1',3',1''-Terphenyl,5'-phenyl- |

**Table S8.** Families and compounds identified after GC/MS

| AROMATICS                           |
|-------------------------------------|
| Benzene                             |
| Toluene                             |
| Ethylbenzene                        |
| p-Xylene                            |
| Styrene                             |
| Benzene,1-ethyl-2-methyl-           |
| Benzene,2-propenyl-                 |
| Benzene, propyl-                    |
| Benzene,1-ethyl-3-methyl-           |
| Benzene, 1-ethyl-2-methyl-          |
| Benzene,1,2,3-trimethyl-            |
| Benzene, 1-ethyl-2-methyl-          |
| .alpha.-Methylstyrene               |
| Benzene, 2-propenyl-                |
| Benzene,1-ethyl-3-methyl-           |
| Benzene,1-ethenyl-2-methyl-         |
| Benzene,1-ethenyl-2-methyl-         |
| Benzene,1-methyl-3-(1-methylethyl)- |
| Benzene,1-ethyl-3-methyl-           |
| o-Cymene                            |
| 1-(2-Methylphenyl)ethanol           |
| Benzene,1-propynyl-                 |
| Benzene,2-ethyl,1,4-dimethyl-       |
| o-Cymene                            |
| o-Isopropenyltoluene                |
| p-Cymene                            |
| o-Isopropenyltoluene                |
| Benzene,1-methyl-4-(2-propenyl)-    |
| Benzene,1,2,4,5-tetramethyl-        |
| Benzene,(2-methyl-1-propenyl)-      |
| 2,4-Dimethylstyrene                 |
| Benzene, (1-methylenebutyl)-        |
| Benzene,1-methyl-4-(2-propenyl)-    |
| Naphthalene, 1,2-dihydro-           |
| Benzene,1-butyryl-                  |



---

(1-Methylenebut-2-enyl)benzene  
Naphthalene  
Benzene, (3-methyl-2-butenyl)-  
Benzothiazole  
1H-Indene,1,3-dimethyl-  
Benzene, (2-cyclopropylethenyl)-  
1H-Indene,1,1-dimethyl-  
Naphthalene,1,2-dihydro,3-methyl-  
Naphthalene,1,2-dihydro, 6-methyl-  
(1-Methylpenta-1,3-dienyl)benzene  
(1-Methylenepent-2-enyl)benzene  
(1-Methylpenta-2,4-dienyl)benzene  
1,2,3-Trimethylindene  
Biphenyl  
Benzo(b)thiophene,2,7-dimethyl-  
Naphthalene,1-ethyl-  
Naphthalene,2,6-dimethyl-  
Naphthalene,1,3-dimethyl-  
Naphthalene,1,7-dimethyl-  
Naphthalene,1,8-dimethyl-  
Quinoline,2,7-dimethyl-  
Naphthalene,1,8-dimethyl-  
1,1'-Biphenyl-4-methyl-  
Acenaphthene  
1,1'-Biphenyl-2-methyl-  
Naphthalene,1-(1-methylethyl)-  
3-(2-Methylpropenyl)-1H-Indene  
Naphthalene,1,4,5-trimethyl-  
Naphthalene,1,4,6-trimethyl-  
Naphthalene,2,3,6-trimethyl-  
1-Isopropenylnaphthalene  
Naphthalene,1,6,7-trimethyl-  
4,6,8-Trimethylazulene  
Fluorene  
Fluorene,2,4a-dihydro-  
1H-Phenylene  
1-Isopropenylnaphthalene  
Naphthalene, 1-(2-nitro-2-propenyl)-  
Benzene, (4,5,5-trimethyl,1,3-cyclopentadien-1-yl)-  
9H-Fluorene,2-methyl-  
9H-Fluorene,1-methyl-  
9H-Fluorene,9-methyl-  
Phenanthrene  
9,10-Ethanoanthracene,9,10-dihydro,11,12-diacetyl-

---



Anthracene, 9,10-dihydro-2-methyl-  
 .alpha. Methylstilbene  
 1H-Indene, 2-phenyl-  
 Anthracene, 1-methyl-  
 1,4-Benzenediamine, N-phenyl-  
 Napthalene,2-phenyl-  
 1,3-Diphenyl-3-methylcyclopropene  
 9,10-Dimethylantracene  
 Pyrene  
 1,3-Pentadiene, 1,1-diphenyl-, (Z)-  
 Retene

---

### CYCLIC HYDROCARBONS

---

1,3-Cyclopentadiene,5-methyl-  
 1,4-Cyclohexadiene  
 Cyclopentene,3-methyl-  
 1,4-Cyclohexadiene  
 Cyclopentadiene, 5,5-dimethyl-  
 1,4-Cyclohexadiene, 1-methyl-  
 1,3-Dimethyl-1-cyclohexene  
 Cyclopentene,1-(1-methylethyl)-  
 Indane  
 1,4-Cyclohexadiene,3-ethenyl,1,4-dimethyl-  
 3a,6-Methano-3aH-indene,2,3,6,7-tetrahydro-  
 Tetracyclo(5.3.0.0.<2.6>0<3.10>)deca-4,8-diene  
 Bicyclo(4.4.1)undeca,1,3,5,7,9-pentaene  
 Benzocycloheptatriene  
 Bi,1,3,5-Cycloheptatrien-1-yl  
 5H-Dibenzo(a,d)cyclohepten-5-ol, 10,11-  
 dihydro-  
 1H-Cyclopropa(l)phenanthrene,1a,9b-dihydro-  
 Cyclobuta(a)dibenzo(c,f)cycloheptadiene, 1-  
 methyl-  
 2,3-Diazabicyclo(2.2.1)hept-2-ene,1,4-diphenyl  
 Tribenzo(a,e,i)cyclododecene

---

### ESTERS

---

2,5-Octadecadiynoic acid, methyl ester  
 4-Hydroxy-4-methylhex-5-enoic acid, tert-butyl-ester  
 4,7,10,13,16,19-Docosahexaenoic acid, methyl ester, (all-Z)-  
 9-Octadecen-12-ynoic acid, methyl ester  
 Geranyl isovalerate  
 10,13-Octadecadiynoic acid, methyl ester  
 9,12,15-Octadecatrienoic aci, 2,3-bis(trimethylsilyl)oxy)propyl) ester  
 (Z,Z,Z)-

---

---

**FATTY ACIDS**


---

10,12-Octadecadiynoic acid  
 Hydrocinnamic acid, o-(1,2,3,4-tetrahydro-2-naphthyl-  
 methyl)-  
 9-Hexadecenoic acid  
 5,8,11,14-Eicosatetraynoic acid  
 Erucid acid  
 5,8,11,14-Eicosatetraynoic acid  
 Oleic acid

---



---

**KETONES**


---

2-Heptadecanone  
 2-Nonadecanone  
 Dasycarpidan-1-  
 one

---



---

**PHENOLS**


---

Phenol  
 Phenol, 2-methyl-  
 p-Cresol  
 Phenol, 2,4-dimethyl-  
 Cathecol  
 Phenol, 2,4,6-trimethyl-  
 Phenol, 2-ethyl-5-methyl-  
 Phenol, 2-ethyl-6-methyl-  
 1,2-Benzenediol, 4-  
 methyl-  
 2-Allylphenol

---



---

**OTHERS OXYGENATED**


---

2-Nonenal, (E)-  
 6,7-Dimethyl, 3,5,8,8a-tetrahydro-1H-2-benzopyran  
 5,7-Dodecadiyn, 1,12-diol  
 Bicyclo(3.1.1)hept-2-ene-2-ethanol, 6,6-dimethyl-  
 Bicyclo(3.1.1)hept-3-ene-spiro-2-4'-(1',3'-dioxane), 7,7-  
 dimethyl-  
 1,2,4-Metheno-1H-cyclobuta(cd)pentalene, 3,5-diol,  
 octahydro-  
 5,7-Dodecadiyn, 1,12-diol  
 Benzaldehyde-4-benzyloxy-3-fluoro-5-methoxy-  
 Olean-12-ene-3,28-diol, (3. beta)-  
 Carnegine  
 13-Heptadecyn-1-ol  
 Ethanol, 2-(9,12-octadecadienyloxy)- (Z,Z)-

---

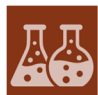

---

**OLEFINS**

---

1-Octene

4-Undecene,5-methyl-, (E)-

2,6-Dimethyl-1,3,5,7-

octatetraene,E,E-

7-Tetradecene

---
